# Supplementary material for: Synthesis, in silico and biodistribution studies of a novel 47Sc-radiolabeled α-amino acid ester derivative attached to pyrazine and tetrazole rings for tumor targeted radiotherapy
Source: publisher site journal article supplement (doi:10.1515/ract-2023-0175), 2024-07-04
Supplement: Supplementary file 1 [file j_ract-2023-0175_suppl.docx]

**Supporting information for “Synthesis, in silico and biodistribution studies of a novel 47Sc-radiolabeled α-amino acid ester derivative attached to pyrazine and tetrazole rings for tumor targeted radiotherapy”**

Mohamed A. Gizawy1*, Hesham A. Shamsel-Din1, Mohsen M. T. El-Tahawy2*, Ayman A. Ibrahim3

*1 Labeled Compounds Department, Hot Labs Center, Egyptian Atomic Energy Authority, P.O. Box 13759, Cairo, Egypt*

*2Chemistry Department, Faculty of Science, Damanhour University, P.O. Box 22511, Damanhour, Egypt*

*3Drug Radiation Research Department, National Center for Radiation Research and Technology (NCRRT), Egyptian Atomic Energy Authority, P. O. Box 29, Nasr City, Cairo 11787, Egypt*

*Corresponding author: Mohamed A. Gizawy Tel: +201065975858, E-mail: [dr_mgizawy@yahoo.com](mailto:dr_mgizawy@yahoo.com),

**Table S1:** The in-vitro serum stability of 47Sc-dipeptide complex

| **Time, h** | **Radiochemical yield, %** |
| --- | --- |
| 2 | 98.7 ± 0.9 |
| 4 | 98.2 ± 1 |
| 6 | 98.4 ± 1.5 |
| 8 | 98.4 ± 1 |
| 10 | 98.5 ± 1.5 |
| 12 | 97.9 ± 0.8 |
| 24 | 98.7 ± 1 |
| 48 | 98.6 ± 0.5 |
| 72 | 98.3 ± 1 |

**Table S2:** The calculated Natural Charge on the individual atoms in the ligand and the complex [Sc(DPL(OH)3)]

| **No. *** | **Atom** | **L** | **complex** | **charge change upon complexation** |
| --- | --- | --- | --- | --- |
| 1 | N | -0.650 | -0.663 | -0.013 |
| 2 | C | -0.160 | -0.178 | -0.018 |
| 3 | C | -0.494 | -0.487 | 0.007 |
| 4 | C | -0.131 | -0.128 | 0.003 |
| 5 | C | -0.029 | -0.027 | 0.002 |
| 6 | C | 0.826 | 0.838 | 0.012 |
| 7 | O | -0.609 | -0.587 | 0.022 |
| 8 | C | -0.092 | -0.096 | -0.004 |
| 9 | C | 0.155 | 0.155 | 0.000 |
| 10 | N | -0.558 | -0.556 | 0.002 |
| 11 | C | -0.230 | -0.240 | -0.010 |
| 12 | C | -0.265 | -0.273 | -0.008 |
| 13 | C | -0.249 | -0.251 | -0.002 |
| 14 | C | -0.272 | -0.270 | 0.002 |
| 15 | C | 0.692 | 0.689 | -0.003 |
| 16 | O | -0.596 | -0.526 | 0.070 |
| 17 | O | -0.633 | -0.639 | -0.006 |
| 18 | C | 0.703 | 0.685 | -0.018 |
| 19 | C | -0.134 | -0.132 | 0.002 |
| 20 | N(N8) | -0.655 | -0.718 | -0.063 |
| 21 | C | -0.082 | -0.087 | -0.005 |
| 22 | C | -0.492 | -0.499 | -0.007 |
| 23 | C | -0.216 | -0.215 | 0.001 |
| 24 | C | -0.221 | -0.222 | -0.001 |
| 25 | C | -0.314 | -0.323 | -0.009 |
| 26 | C | 0.304 | 0.322 | 0.018 |
| 27 | C | -0.293 | -0.288 | 0.005 |
| 28 | O | -0.699 | -0.681 | 0.018 |
| 29 | C | -0.375 | -0.374 | 0.001 |
| 30 | N(N2) | -0.490 | -0.550 | -0.060 |
| 31 | C | -0.007 | 0.015 | 0.022 |
| 32 | C | -0.083 | -0.063 | 0.020 |
| 33 | N | -0.403 | -0.394 | 0.009 |
| 34 | C | -0.073 | -0.034 | 0.039 |
| 35 | C | 0.368 | 0.386 | 0.018 |
| 36 | N(N3) | -0.628 | -0.661 | -0.033 |
| 37 | C | -0.317 | -0.312 | 0.005 |
| 38 | N | -0.280 | -0.276 | 0.004 |
| 39 | C | 0.310 | 0.327 | 0.017 |
| 40 | N(N4) | -0.302 | -0.317 | -0.015 |
| 41 | N | 0.016 | 0.022 | 0.006 |
| 42 | N | -0.027 | -0.019 | 0.008 |
| 43 | O | -0.546 | -0.546 | 0.000 |
| 44 | C | -0.742 | -0.722 | 0.020 |
| 45 | C | -0.135 | -0.117 | 0.018 |
| 46 | H | 0.436 | 0.459 | 0.023 |
| 47 | H | 0.274 | 0.280 | 0.006 |
| 48 | H | 0.284 | 0.250 | -0.034 |
| 49 | H | 0.254 | 0.268 | 0.014 |
| 50 | H | 0.249 | 0.266 | 0.017 |
| 51 | H | 0.445 | 0.439 | -0.006 |
| 52 | H | 0.241 | 0.241 | 0.000 |
| 53 | H | 0.243 | 0.244 | 0.001 |
| 54 | H | 0.244 | 0.245 | 0.001 |
| 55 | H | 0.243 | 0.244 | 0.001 |
| 56 | H | 0.243 | 0.261 | 0.018 |
| 57 | H | 0.449 | 0.447 | -0.002 |
| 58 | H | 0.273 | 0.273 | 0.000 |
| 59 | H | 0.259 | 0.254 | -0.005 |
| 60 | H | 0.263 | 0.267 | 0.004 |
| 61 | H | 0.244 | 0.239 | -0.005 |
| 62 | H | 0.244 | 0.239 | -0.005 |
| 63 | H | 0.263 | 0.263 | 0.000 |
| 64 | H | 0.497 | 0.491 | -0.006 |
| 65 | H | 0.278 | 0.295 | 0.017 |
| 66 | H | 0.278 | 0.278 | 0.000 |
| 67 | H | 0.231 | 0.259 | 0.028 |
| 68 | H | 0.232 | 0.254 | 0.022 |
| 69 | H | 0.229 | 0.236 | 0.007 |
| 70 | H | 0.442 | 0.457 | 0.015 |
| 71 | H | 0.264 | 0.264 | 0.000 |
| 72 | H | 0.258 | 0.279 | 0.021 |
| 73 | H | 0.267 | 0.253 | -0.014 |
| 74 | H | 0.249 | 0.245 | -0.004 |
| 75 | H | 0.243 | 0.242 | -0.001 |
| 76 | H | 0.240 | 0.209 | -0.031 |
| 77 | H | 0.247 | 0.237 | -0.010 |
| 78 | Sc | 3.000 | 1.558 | -1.442 |
| 79 | O(Oa1) | -1.281 | -1.106 | 0.175 |
| 80 | H | 0.281 | 0.483 | 0.202 |
| 81 | O(Oe) | -1.281 | -1.022 | 0.259 |
| 82 | H | 0.281 | 0.509 | 0.227 |
| 83 | O(Oa2) | -1.281 | -1.061 | 0.221 |
| 84 | H | 0.281 | 0.492 | 0.210 |
| net charge | | 0.000 | 0.000 |  |
| 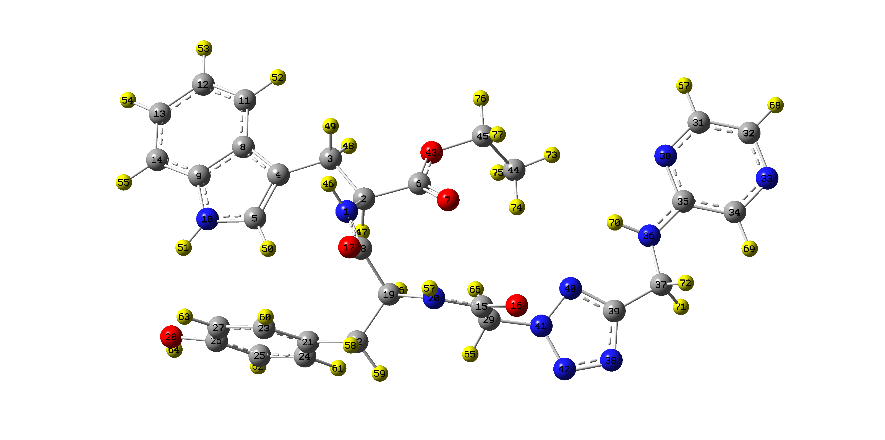 | | | | |

* for atom numeration see attached figure

**Table S3:**  The most important interactions between NBO donor and acceptor which stabilize the [Sc(DPL(OH)3)] complex by more than 5 kcal/mol.

| **Donor NBO (i)** | | |  | **Acceptor NBO (j)** | | |  | **E(2) kcal/mol*** | **E(j)-E(i) a.u.** | **F(i,j) a.u.** |
| --- | --- | --- | --- | --- | --- | --- | --- | --- | --- | --- |
| **Orbital** | **hybridizations** | **Occ.** | **Orbital** | **hybridizations** | **Occ.** |  |
| LP1(N2) | s(26.83%), p(73.14%) | 1.82 |  | LP*4(Sc) | s(72.59%), p(8.36%), d(19.03%) | 0.17 |  | 40.2 | 0.5 | 0.1 |
|  | LP*2(Sc) | s(17.14%), p( 4.80%), d(77.93%) | 0.21 |  | 6.2 | 0.5 | 0.1 |
|  | LP*7(Sc) | s(1.22%), p(61.37%), d(37.32%) | 0.12 |  | 4.9 | 0.6 | 0.0 |
| Total |  |  |  |  |  |  |  | **62.3** |  |  |
| LP1(N4) | s(37.69%), p(62.20%) | 1.88 |  | LP*4(Sc) | s(72.59%), p(8.36%), d(19.03%) | 0.17 |  | 10.1 | 0.6 | 0.1 |
|  | LP*8(Sc) | s(0.07%), p(67.48%), d(32.37%) | 0.11 |  | 7.6 | 0.7 | 0.1 |
|  | LP*9(Sc) | s(2.30%), p(72.45%), d(25.20%) | 0.09 |  | 5.0 | 0.6 | 0.1 |
| Total |  |  |  |  |  |  |  | **35.5** |  |  |
| LP1(N8) | p(99.99%) | 1.63 |  | LP*9(Sc) | s(2.30%), p(72.45%), d(25.20%) | 0.09 |  | 9.5 | 0.5 | 0.1 |
|  | LP*4(Sc) | s(72.59%), p(8.36%), d(19.03%) | 0.17 |  | 7.9 | 0.5 | 0.1 |
| Total |  |  |  |  |  |  |  | **26.6** |  |  |
| BD1(Oa1) | s(24.29%), p(75.63%) | 1.99 |  | LP*7(Sc) | s(1.22%), p(61.37%), d(37.32%) | 0.12 |  | 5.5 | 0.9 | 0.1 |
| LP1(Oa1) | s(35.34%), p(64.64%) | 1.91 |  | LP*7(Sc) | s(1.22%), p(61.37%), d(37.32%) | 0.12 |  | 14.1 | 0.7 | 0.1 |
|  | LP*6(Sc) | s(0.14%), p(44.75%), d(55.05%) | 0.14 |  | 5.7 | 0.6 | 0.1 |
| LP2(Oa1) | s(6.51%), p(93.46%) | 1.89 |  | LP*8(Sc) | s(0.07%), p(67.48%), d(32.37%) | 0.11 |  | 8.1 | 0.5 | 0.1 |
|  | LP*1(Sc) | s(1.37%), p(1.90%), d(96.68%) | 0.28 |  | 6.2 | 0.4 | 0.0 |
|  | LP*3(Sc) | s(2.55%), p( 3.06%), d(94.28%) | 0.20 |  | 5.1 | 0.4 | 0.0 |
| LP3(Oa1) | s(33.93%), p(66.05%) | 1.83 |  | LP*1(Sc) | s(1.37%), p(1.90%), d(96.68%) | 0.28 |  | 34.1 | 0.6 | 0.1 |
|  | LP*2(Sc) | s(17.14%), p( 4.80%), d(77.93%) | 0.21 |  | 28.5 | 0.6 | 0.1 |
|  | LP*7(Sc) | s(1.22%), p(61.37%), d(37.32%) | 0.12 |  | 22.2 | 0.7 | 0.1 |
|  | LP*4(Sc) | s(72.59%), p(8.36%), d(19.03%) | 0.17 |  | 11.8 | 0.7 | 0.1 |
|  | LP*8(Sc) | s(0.07%), p(67.48%), d(32.37%) | 0.11 |  | 8.9 | 0.7 | 0.1 |
|  | LP*6(Sc) | s(0.14%), p(44.75%), d(55.05%) | 0.14 |  | 7.0 | 0.6 | 0.1 |
| Total |  |  |  |  |  |  |  | **213.9** |  |  |
| BD1(Oe) | s(26.06%), p(73.88%) | 1.98 |  | LP*9(Sc) | s(2.30%), p(72.45%), d(25.20%) | 0.09 |  | 5.9 | 0.9 | 0.1 |
| CR1(Oe) | s(100.00%) | 2.00 |  | LP*2(Sc) | s(17.14%), p( 4.80%), d(77.93%) | 0.21 |  | 5.1 | 19.0 | 0.3 |
| LP1(Oe) | s(28.33%), p(71.64%) | 1.87 |  | LP*6(Sc) | s(0.14%), p(44.75%), d(55.05%) | 0.14 |  | 35.6 | 0.6 | 0.1 |
|  | LP*2(Sc) | s(17.14%), p( 4.80%), d(77.93%) | 0.21 |  | 17.6 | 0.6 | 0.1 |
|  | LP*5(Sc) | s(0.14%), p(44.75%), d(55.05%) | 0.14 |  | 9.6 | 0.6 | 0.1 |
|  | LP*1(Sc) | s(1.37%), p(1.90%), d(96.68%) | 0.28 |  | 5.2 | 0.6 | 0.1 |
| LP2(Oe) | s(5.20%), p(94.78%) | 1.86 |  | LP*3(Sc) | s(2.55%), p( 3.06%), d(94.28%) | 0.20 |  | 21.0 | 0.4 | 0.1 |
|  | LP*5(Sc) | s(0.14%), p(44.75%), d(55.05%) | 0.14 |  | 10.6 | 0.4 | 0.1 |
|  | LP*6(Sc) | s(0.14%), p(44.75%), d(55.05%) | 0.14 |  | 5.7 | 0.4 | 0.0 |
| LP3(Oe) | s(40.42%), p(59.56% | 1.79 |  | LP*2(Sc) | s(17.14%), p( 4.80%), d(77.93%) | 0.21 |  | 56.0 | 0.7 | 0.2 |
|  | LP*1(Sc) | s(1.37%), p(1.90%), d(96.68%) | 0.28 |  | 40.7 | 0.7 | 0.2 |
|  | LP*6(Sc) | s(0.14%), p(44.75%), d(55.05%) | 0.14 |  | 13.9 | 0.7 | 0.1 |
|  | LP*3(Sc) | s(2.55%), p( 3.06%), d(94.28%) | 0.20 |  | 11.9 | 0.6 | 0.1 |
|  | LP*9(Sc) | s(2.30%), p(72.45%), d(25.20%) | 0.09 |  | 9.2 | 0.7 | 0.1 |
| Total |  |  |  |  |  |  |  | **307.3** |  |  |
| BD1(Oa2) | s(23.93%), p(75.98% | 1.98 |  | LP*8(Sc) | s(0.07%), p(67.48%), d(32.37%) | 0.11 |  | 5.8 | 0.9 | 0.1 |
| LP1(Oa2) | s(35.62%), p(64.34%) | 1.93 |  | LP*8(Sc) | s(0.07%), p(67.48%), d(32.37%) | 0.11 |  | 15.6 | 0.7 | 0.1 |
|  | LP*5(Sc) | s(0.14%), p(44.75%), d(55.05%) | 0.14 |  | 8.2 | 0.6 | 0.1 |
|  | LP*3(Sc) | s(2.55%), p( 3.06%), d(94.28%) | 0.20 |  | 5.6 | 0.5 | 0.1 |
| LP2(Oa2) | s(0.13%), p(99.82%) | 1.84 |  | LP*5(Sc) | s(0.14%), p(44.75%), d(55.05%) | 0.14 |  | 14.9 | 0.4 | 0.1 |
| LP3(Oa1) | s(40.27%), p(59.71%) | 1.81 |  | LP*1(Sc) | s(1.37%), p(1.90%), d(96.68%) | 0.28 |  | 49.1 | 0.7 | 0.2 |
|  | LP*8(Sc) | s(0.07%), p(67.48%), d(32.37%) | 0.11 |  | 26.9 | 0.8 | 0.1 |
|  | LP*3(Sc) | s(2.55%), p( 3.06%), d(94.28%) | 0.20 |  | 18.6 | 0.6 | 0.1 |
|  | LP*4(Sc) | s(72.59%), p(8.36%), d(19.03%) | 0.17 |  | 13.0 | 0.7 | 0.1 |
|  | LP*7(Sc) | s(1.22%), p(61.37%), d(37.32%) | 0.12 |  | 7.5 | 0.7 | 0.1 |
|  | LP*2(Sc) | s(17.14%), p( 4.80%), d(77.93%) | 0.21 |  | 6.2 | 0.7 | 0.1 |
|  | LP*5(Sc) | s(0.14%), p(44.75%), d(55.05%) | 0.14 |  | 5.2 | 0.7 | 0.1 |
| Total |  |  |  |  |  |  |  | **231.64** |  |  |

*values in bold show the samation of the interaction between the specfic atom of the donor and the accptor


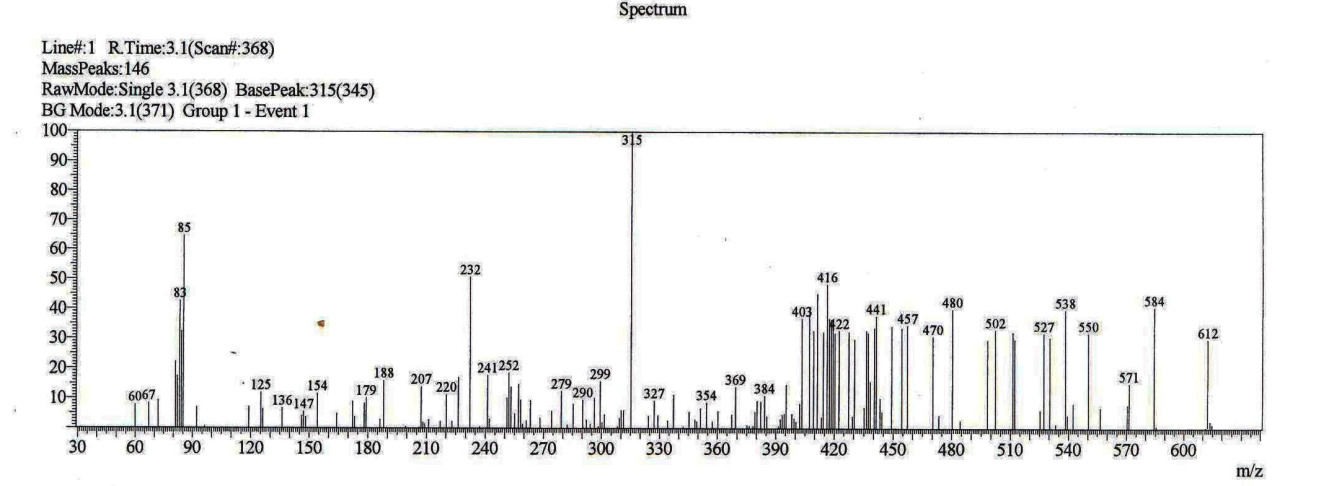


**Figure S1:** The mass spectrum of DPL

**
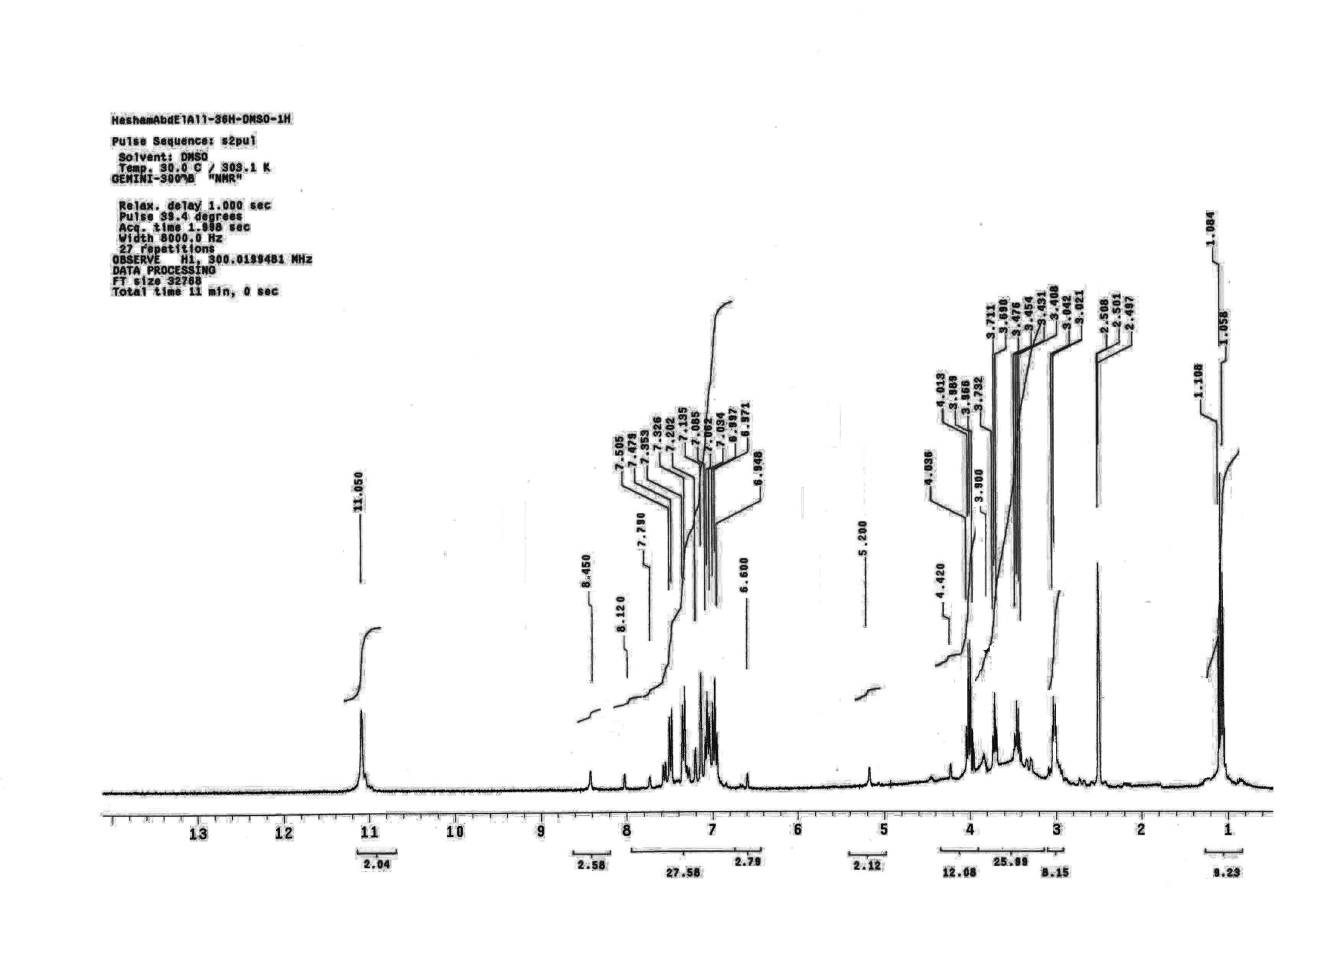
**

**Figure S2:** The 1H-NMR spectrum of DPL


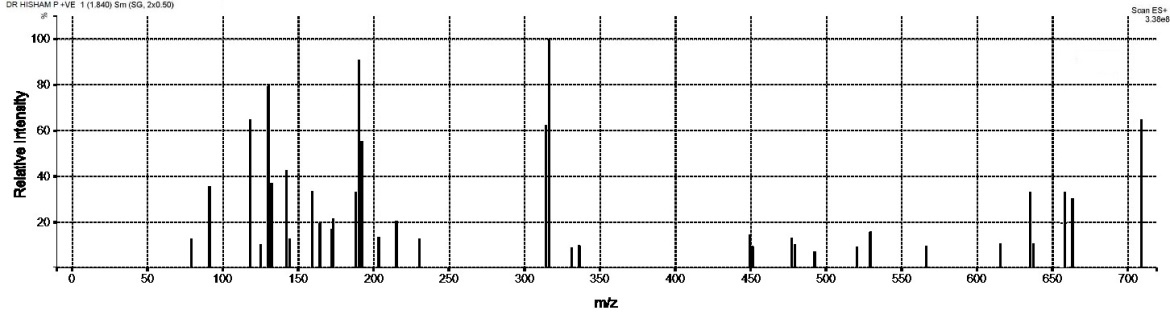


**Figure S3:** The LC-MS spectrum of [Sc(DPL)](OH)3 complex


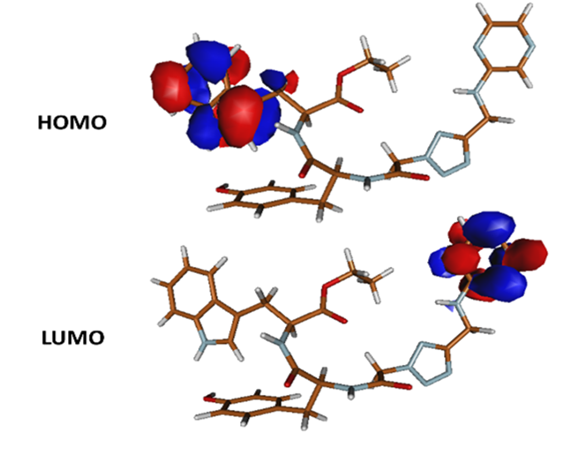


**Figure S4:** The frontier molecular orbitals (HOMO & LUMO) of DPL
